# Supplementary material for: Characterizing the BCG Induced Macrophage and Neutrophil Mechanisms for Defense Against Mycobacterium tuberculosis
Source: PubMed Central journal article supplement (PMC7314953; doi:10.3389/fimmu.2020.01202), 2020-06-18
Supplement: Data_Sheet_1.pdf [file Data_Sheet_1.pdf]

## Supplementary Table 1

| Marker       | Fluorophore     | Isotype           | Clone     | Vendor            |
|--------------|-----------------|-------------------|-----------|-------------------|
| CD11b        | Alexa Fluor 700 | Rat IgG2b         | M1/70     | BD Biosciences    |
| CD11c        | BV510           | Arm Ham IgG1      | HL3       | BD Biosciences    |
| Siglec F     | PercP cy5.5     | Rat IgG2a         | E50-2440  | BD Biosciences    |
| Ly6G         | PEcy7           | Rat IgG2b         | RB6-8C5   | Tonbo Biosciences |
| Ly6C         | APC             | Rat IgG2a         | 1G7.G10   | Miltenyi Biotec   |
| F4/80        | PE              | Rat IgG2b kappa   | BM8.1     | Tonbo Biosciences |
| I-A[b] MHCII | BV421           | Mouse IgG2a       | AF6-120.1 | BD Biosciences    |
| CD14         | FITC            | Mouse IgG1 kappa  | X54-5/7.1 | Biolegend         |
| NK 1.1       | PE              | Mouse IgG2a kappa | PK136     | Tonbo Biosciences |

## Supplementary Table 1

Details of antibodies used for flow cytometry in the current studies.

## Supplementary Figure 1

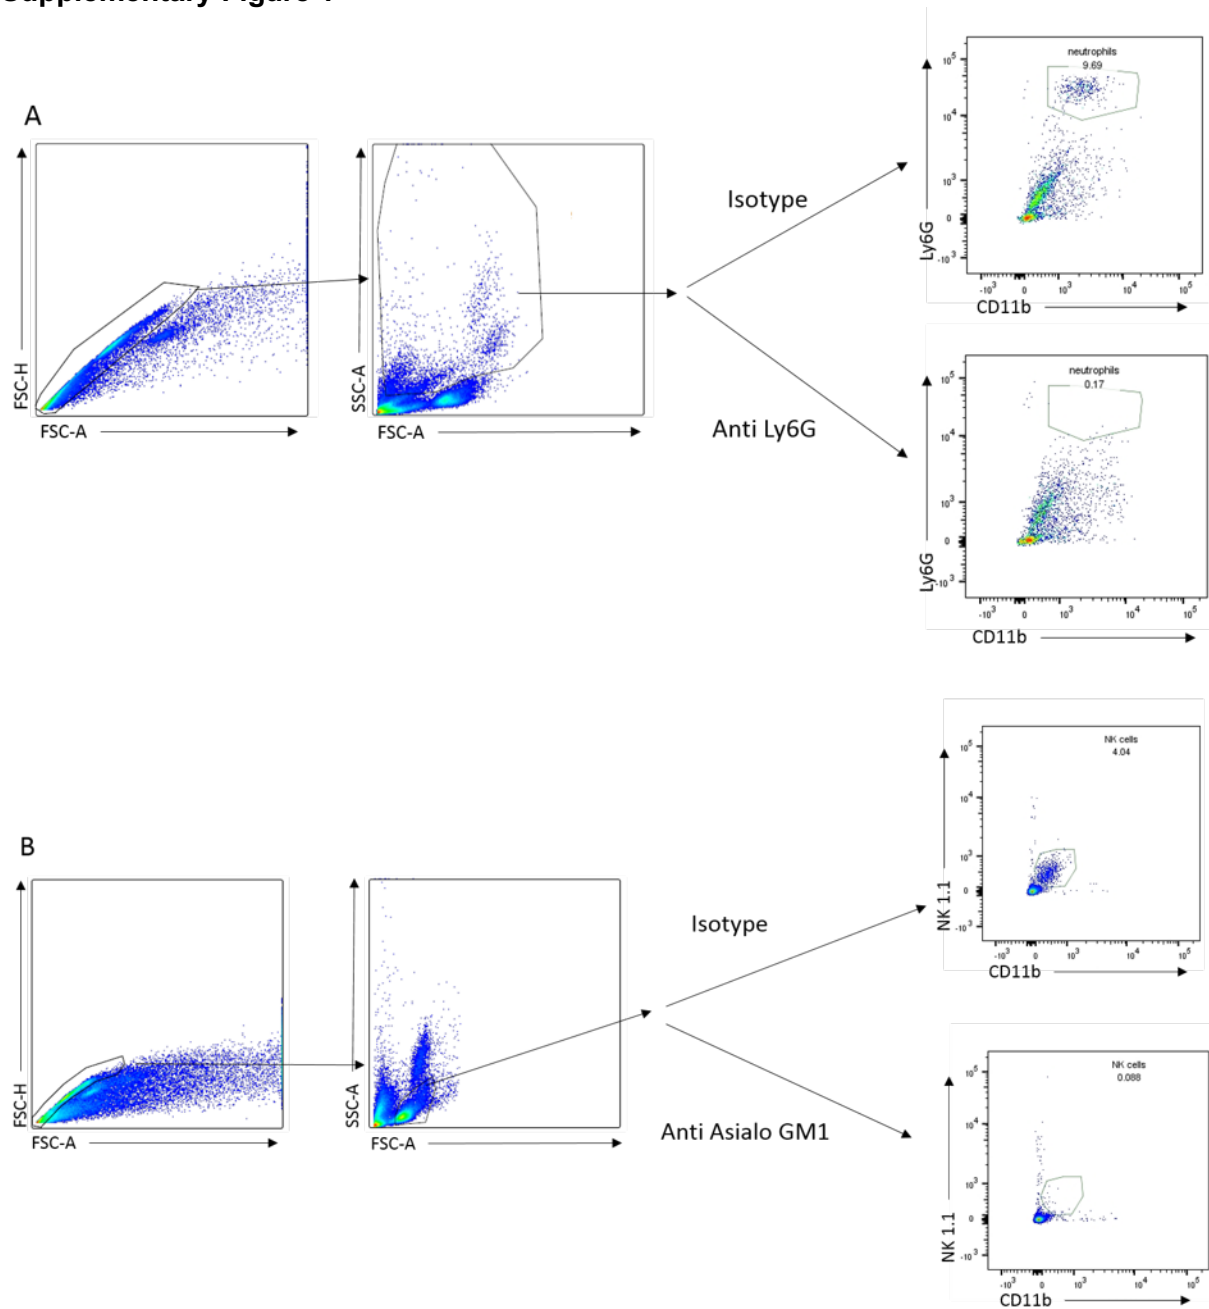

## Supplementary Figure 1

Flow cytometric confirmation of neutrophil depletion using a Ly6G antibody (A) and of natural killer cell depletion using an NK1.1 antibody (B). Peripheral blood mononuclear cells were used to examine the efficacy of depletion.

## Supplementary Figure 2

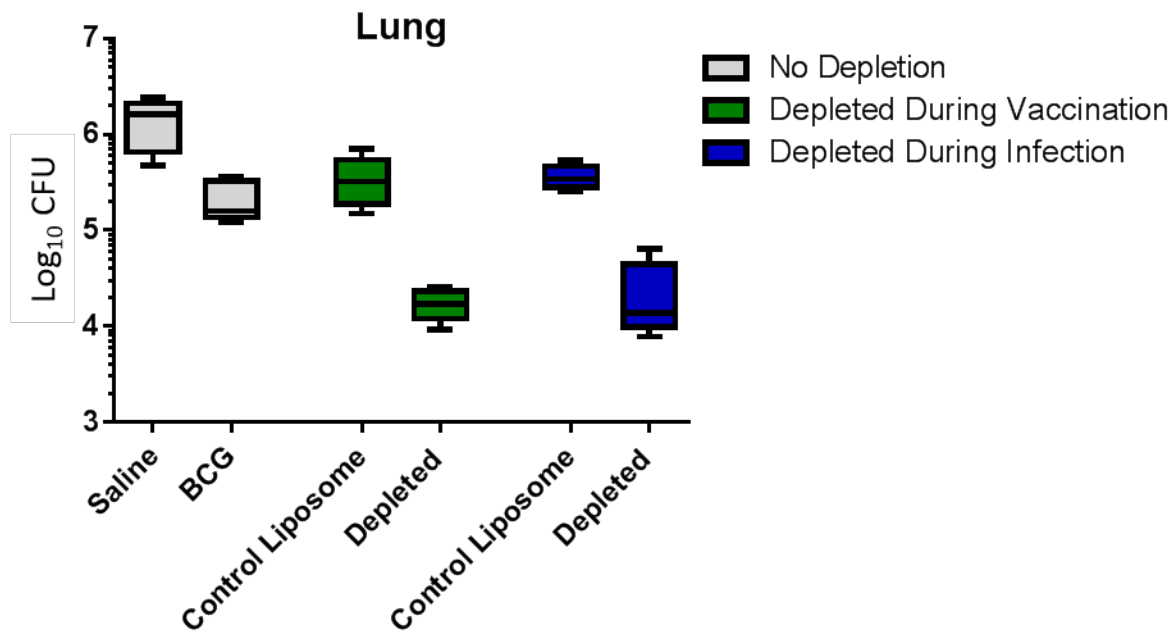

## Supplementary Figure 2

C57BL/6 depleted of monocytes/macrophages through intravenous liposomal clodronate depletion still are protected by subcutaneous BCG vaccination 7 days prior to low dose aerosol infection. Depletions were carried out during BCG vaccination and during H37Rv infection.

### Supplementary Figure 3

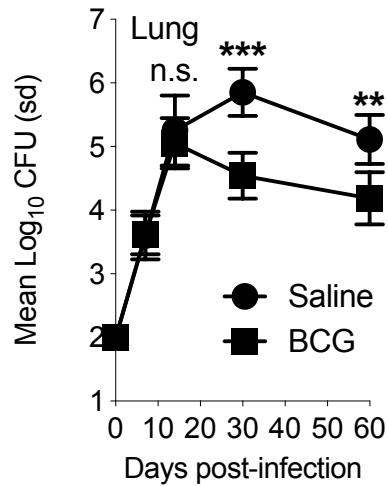

### Supplementary Figure 3

C57BL/6 mice were vaccinated subcutaneously with  $5 \times 10^4$  CFU BCG, rested for 30 days and then infected with a low dose aerosol of *M. tuberculosis* H37Rv. The Log<sub>10</sub> CFU was determined at days 0, 7, 14, 30 and 60 post infection. Data are representative of two separate experiments. Experiments were performed with N=4-5 mice per group per time point. \*\* $p \leq 0.01$ , \*\*\* $p \leq 0.001$ , n.s. = not significant, using the Student *t*-test.
